# Supplementary material for: Determinants of subclinical leprosy among household contacts in Indonesia: serological and socio-demographic factors
Source: PeerJ. 2026 Jan 12;14:e20631. doi: 10.7717/peerj.20631 (PMC12805909; doi:10.7717/peerj.20631)
Supplement: Supplemental Information 1 — The complete dataset containing demographic variables, serological results, and other parameters analyzed in this study. [file peerj-14-20631-s001.xlsx]

## Sheet: The data
Number	Lab	Sex	Age Group (years)	Marital status	Educational level	Occupation	Income	Family member status	Contact length	Personal Hygiene	Room density	BCG Vaccination	Scar tissue
12	Seropositive	Male	25-34	Single	Completed primary education	Student	Low income	Son/Daughter	>=2 years	Good	< 8m2 per 2 person	Yes	Yes
1	Seronegative	Female	1-4	Single	Without education	Not working	High income	Son/Daughter	<=2 years	Good	< 8m2 per 2 person	Yes	Yes
2	Seronegative	Male	1-4	Single	Without education	Not working	Low income	Grandchild	<=2 years	Good	< 8m2 per 2 person	Yes	Yes
8	Seropositive	Female	45-54	Single	Without education	Not working	Low income	Husbnad/Wife	>=2 years	Good	< 8m2 per 2 person	Yes	Yes
3	Seropositive	Female	55-64	Married	Without education	Not working	Low income	Husbnad/Wife	>=2 years	Good	< 8m2 per 2 person	Yes	Yes
6	Seronegative	Female	45-54	Single	Not completed primary education	Not working	Low income	Husbnad/Wife	>=2 years	Good	< 8m2 per 2 person	Yes	Yes
9	Seronegative	Female	15-24	Married	Completed primary education	Not working	Low income	Husbnad/Wife	>=2 years	Good	< 8m2 per 2 person	Yes	Yes
7	Seropositive	Female	25-34	Married	Completed primary education	Not working	Low income	Husbnad/Wife	>=2 years	Good	< 8m2 per 2 person	Yes	Yes
4	Seropositive	Female	35-44	Married	Completed primary education	Not working	Low income	Husbnad/Wife	>=2 years	Good	< 8m2 per 2 person	Yes	Yes
5	Seronegative	Female	55-64	Married	Not completed primary education	Labor	Low income	Husbnad/Wife	>=2 years	Good	< 8m2 per 2 person	Yes	Yes
10	Seronegative	Male	45-54	Married	Completed senior high school	Labor	Low income	Husbnad/Wife	>=2 years	Good	< 8m2 per 2 person	Yes	Yes
20	Seronegative	Female	15-24	Single	Completed primary education	Not working	Low income	Son/Daughter	>=2 years	Good	< 8m2 per 2 person	Yes	Yes
44	Seronegative	Female	15-24	Single	Completed junior high school	Not working	Low income	Son/Daughter	>=2 years	Good	< 8m2 per 2 person	Yes	Yes
21	Seropositive	Female	15-24	Married	Completed senior high school	Not working	Low income	Son/Daughter	>=2 years	Good	< 8m2 per 2 person	Yes	Yes
14	Seropositive	Female	35-44	Married	Completed senior high school	Not working	Low income	Son/Daughter	>=2 years	Good	< 8m2 per 2 person	Yes	Yes
23	Seropositive	Male	5-9	Single	Without education	Student	Low income	Son/Daughter	>=2 years	Good	< 8m2 per 2 person	Yes	Yes
15	Seropositive	Male	5-9	Single	Not completed primary education	Student	Low income	Son/Daughter	>=2 years	Good	< 8m2 per 2 person	Yes	Yes
17	Seronegative	Male	5-9	Single	Not completed primary education	Student	Low income	Son/Daughter	>=2 years	Good	< 8m2 per 2 person	Yes	Yes
24	Seronegative	Female	5-9	Single	Not completed primary education	Student	Low income	Son/Daughter	>=2 years	Good	< 8m2 per 2 person	Yes	Yes
31	Seronegative	Female	5-9	Single	Not completed primary education	Student	Low income	Son/Daughter	>=2 years	Good	< 8m2 per 2 person	Yes	Yes
42	Seronegative	Female	5-9	Single	Not completed primary education	Student	Low income	Son/Daughter	>=2 years	Good	< 8m2 per 2 person	Yes	Yes
29	Seropositive	Male	10-14	Single	Not completed primary education	Student	Low income	Son/Daughter	>=2 years	Good	< 8m2 per 2 person	Yes	Yes
11	Seronegative	Male	10-14	Single	Not completed primary education	Student	Low income	Son/Daughter	>=2 years	Good	< 8m2 per 2 person	Yes	Yes
43	Seronegative	Male	10-14	Single	Completed primary education	Student	Low income	Son/Daughter	>=2 years	Good	< 8m2 per 2 person	Yes	Yes
25	Seropositive	Female	10-14	Single	Completed primary education	Student	Low income	Son/Daughter	>=2 years	Good	< 8m2 per 2 person	Yes	Yes
22	Seronegative	Female	10-14	Single	Completed primary education	Student	Low income	Son/Daughter	>=2 years	Good	< 8m2 per 2 person	Yes	Yes
45	Seropositive	Male	15-24	Single	Completed junior high school	Student	Low income	Son/Daughter	>=2 years	Good	< 8m2 per 2 person	Yes	Yes
26	Seronegative	Female	15-24	Single	Completed junior high school	Student	Low income	Son/Daughter	>=2 years	Good	< 8m2 per 2 person	Yes	Yes
27	Seropositive	Male	15-24	Single	Completed senior high school	Student	Low income	Son/Daughter	>=2 years	Good	< 8m2 per 2 person	Yes	Yes
30	Seronegative	Male	15-24	Single	Completed senior high school	Student	Low income	Son/Daughter	>=2 years	Good	< 8m2 per 2 person	Yes	Yes
28	Seropositive	Female	15-24	Single	Completed senior high school	Student	Low income	Son/Daughter	>=2 years	Good	< 8m2 per 2 person	Yes	Yes
16	Seronegative	Female	15-24	Married	Higher Education	Private sector employee	Low income	Son/Daughter	>=2 years	Good	< 8m2 per 2 person	Yes	Yes
18	Seropositive	Male	35-44	Married	Completed junior high school	Self employee	Low income	Son/Daughter	>=2 years	Good	< 8m2 per 2 person	Yes	Yes
13	Seronegative	Male	15-24	Single	Completed junior high school	Labor	Low income	Son/Daughter	>=2 years	Good	< 8m2 per 2 person	Yes	Yes
19	Seronegative	Male	15-24	Single	Completed senior high school	Labor	Low income	Son/Daughter	>=2 years	Good	< 8m2 per 2 person	Yes	Yes
32	Seropositive	Male	25-34	Married	Completed senior high school	Labor	Low income	Son/Daughter	>=2 years	Good	< 8m2 per 2 person	Yes	Yes
35	Seropositive	Male	5-9	Single	Without education	Not working	Low income	Grandchild	>=2 years	Good	< 8m2 per 2 person	Yes	Yes
37	Seropositive	Male	10-14	Single	Not completed primary education	Student	Low income	Grandchild	>=2 years	Good	< 8m2 per 2 person	Yes	Yes
33	Seronegative	Male	10-14	Single	Not completed primary education	Student	Low income	Grandchild	>=2 years	Good	< 8m2 per 2 person	Yes	Yes
38	Seropositive	Male	10-14	Single	Completed primary education	Student	Low income	Grandchild	>=2 years	Good	< 8m2 per 2 person	Yes	Yes
34	Seronegative	Male	10-14	Single	Completed primary education	Student	Low income	Grandchild	>=2 years	Good	< 8m2 per 2 person	Yes	Yes
36	Seropositive	Female	10-14	Single	Completed primary education	Student	Low income	Grandchild	>=2 years	Good	< 8m2 per 2 person	Yes	Yes
39	Seronegative	Female	25-34	Married	Completed junior high school	Not working	Low income	Son/Daughter in Law	>=2 years	Good	< 8m2 per 2 person	Yes	Yes
40	Seronegative	Female	45-54	Married	Completed primary education	Labor	Low income	Parents/Parents in Law	>=2 years	Good	< 8m2 per 2 person	Yes	Yes
41	Seronegative	Female	45-54	Married	Completed primary education	Labor	Low income	Parents/Parents in Law	>=2 years	Good	< 8m2 per 2 person	Yes	Yes
46	Seronegative	Female	15-24	Single	Completed senior high school	Student	Low income	Other families	>=2 years	Good	< 8m2 per 2 person	Yes	Yes
48	Seronegative	Male	15-24	Single	Completed junior high school	Not working	Low income	Son/Daughter	>=2 years	Poor	< 8m2 per 2 person	Yes	Yes
47	Seronegative	Male	5-9	Single	Without education	Not working	Low income	Other families	>=2 years	Poor	< 8m2 per 2 person	Yes	Yes
49	Seronegative	Male	1-4	Single	Completed senior high school	Not working	Low income	Son/Daughter	<=2 years	Good	> 8m2 per 2 person	Yes	Yes
50	Seronegative	Female	1-4	Single	Without education	Labor	Low income	Son/Daughter	<=2 years	Good	> 8m2 per 2 person	Yes	Yes
51	Seronegative	Female	1-4	Single	Without education	Not working	High income	Grandchild	<=2 years	Good	> 8m2 per 2 person	Yes	Yes
52	Seropositive	Male	1-4	Single	Without education	Not working	Low income	Grandchild	<=2 years	Good	> 8m2 per 2 person	Yes	Yes
54	Seronegative	Female	55-64	Widowed	Completed primary education	Not working	High income	Husbnad/Wife	>=2 years	Good	> 8m2 per 2 person	Yes	Yes
147	Seropositive	Female	15-24	Married	Completed senior high school	Not working	High income	Husbnad/Wife	>=2 years	Good	> 8m2 per 2 person	Yes	Yes
60	Seronegative	Female	45-54	Married	Without education	Not working	Low income	Husbnad/Wife	>=2 years	Good	> 8m2 per 2 person	Yes	Yes
61	Seronegative	Female	35-44	Married	Not completed primary education	Not working	Low income	Husbnad/Wife	>=2 years	Good	> 8m2 per 2 person	Yes	Yes
58	Seropositive	Female	55-64	Married	Completed primary education	Not working	Low income	Husbnad/Wife	>=2 years	Good	> 8m2 per 2 person	Yes	Yes
57	Seropositive	Female	35-44	Married	Completed junior high school	Not working	Low income	Husbnad/Wife	>=2 years	Good	> 8m2 per 2 person	Yes	Yes
59	Seronegative	Female	55-64	Married	Completed junior high school	Not working	Low income	Husbnad/Wife	>=2 years	Good	> 8m2 per 2 person	Yes	Yes
56	Seronegative	Female	35-44	Married	Completed senior high school	Not working	Low income	Husbnad/Wife	>=2 years	Good	> 8m2 per 2 person	Yes	Yes
62	Seronegative	Female	55-64	Married	Completed senior high school	Not working	Low income	Husbnad/Wife	>=2 years	Good	> 8m2 per 2 person	Yes	Yes
63	Seropositive	Female	45-54	Married	Without education	Government employee	Low income	Husbnad/Wife	>=2 years	Good	> 8m2 per 2 person	Yes	Yes
55	Seropositive	Female	45-54	Married	Not completed primary education	Self employee	Low income	Husbnad/Wife	>=2 years	Good	> 8m2 per 2 person	Yes	Yes
64	Seronegative	Female	55-64	Married	Not completed primary education	Labor	Low income	Husbnad/Wife	>=2 years	Good	> 8m2 per 2 person	Yes	Yes
65	Seropositive	Female	25-34	Married	Completed junior high school	Labor	Low income	Husbnad/Wife	>=2 years	Good	> 8m2 per 2 person	Yes	Yes
68	Seronegative	Female	15-24	Single	Completed senior high school	Not working	High income	Son/Daughter	>=2 years	Good	> 8m2 per 2 person	Yes	Yes
69	Seronegative	Female	10-14	Single	Completed junior high school	Student	High income	Son/Daughter	>=2 years	Good	> 8m2 per 2 person	Yes	Yes
70	Seronegative	Male	15-24	Single	Completed junior high school	Student	High income	Son/Daughter	>=2 years	Good	> 8m2 per 2 person	Yes	Yes
67	Seronegative	Female	15-24	Single	Completed junior high school	Student	High income	Son/Daughter	>=2 years	Good	> 8m2 per 2 person	Yes	Yes
71	Seropositive	Female	15-24	Single	Completed senior high school	Student	High income	Son/Daughter	>=2 years	Good	> 8m2 per 2 person	Yes	Yes
66	Seronegative	Female	25-34	Divorced	Completed senior high school	Private sector employee	High income	Son/Daughter	>=2 years	Good	> 8m2 per 2 person	Yes	Yes
72	Seronegative	Female	25-34	Married	Completed junior high school	Labor	High income	Son/Daughter	>=2 years	Good	> 8m2 per 2 person	Yes	Yes
84	Seronegative	Male	5-9	Single	Without education	Not working	Low income	Son/Daughter	>=2 years	Good	> 8m2 per 2 person	Yes	Yes
86	Seropositive	Male	15-24	Single	Completed senior high school	Not working	Low income	Son/Daughter	>=2 years	Good	> 8m2 per 2 person	Yes	Yes
76	Seronegative	Male	15-24	Single	Completed senior high school	Not working	Low income	Son/Daughter	>=2 years	Good	> 8m2 per 2 person	Yes	Yes
87	Seronegative	Male	15-24	Single	Completed senior high school	Not working	Low income	Son/Daughter	>=2 years	Good	> 8m2 per 2 person	Yes	Yes
73	Seropositive	Female	15-24	Single	Completed senior high school	Not working	Low income	Son/Daughter	>=2 years	Good	> 8m2 per 2 person	Yes	Yes
85	Seronegative	Male	25-34	Single	Completed senior high school	Not working	Low income	Son/Daughter	>=2 years	Good	> 8m2 per 2 person	Yes	Yes
88	Seropositive	Male	15-24	Married	Completed senior high school	Not working	Low income	Son/Daughter	>=2 years	Good	> 8m2 per 2 person	Yes	Yes
89	Seropositive	Female	15-24	Married	Completed senior high school	Not working	Low income	Son/Daughter	>=2 years	Good	> 8m2 per 2 person	Yes	Yes
91	Seropositive	Female	5-9	Single	Without education	Student	Low income	Son/Daughter	>=2 years	Good	> 8m2 per 2 person	Yes	Yes
77	Seropositive	Female	5-9	Single	Not completed primary education	Student	Low income	Son/Daughter	>=2 years	Good	> 8m2 per 2 person	Yes	Yes
97	Seropositive	Female	5-9	Single	Not completed primary education	Student	Low income	Son/Daughter	>=2 years	Good	> 8m2 per 2 person	Yes	Yes
90	Seronegative	Female	10-14	Single	Not completed primary education	Student	Low income	Son/Daughter	>=2 years	Good	> 8m2 per 2 person	Yes	Yes
92	Seronegative	Female	10-14	Single	Not completed primary education	Student	Low income	Son/Daughter	>=2 years	Good	> 8m2 per 2 person	Yes	Yes
75	Seropositive	Male	10-14	Single	Completed primary education	Student	Low income	Son/Daughter	>=2 years	Good	> 8m2 per 2 person	Yes	Yes
93	Seropositive	Male	10-14	Single	Completed primary education	Student	Low income	Son/Daughter	>=2 years	Good	> 8m2 per 2 person	Yes	Yes
98	Seropositive	Male	10-14	Single	Completed primary education	Student	Low income	Son/Daughter	>=2 years	Good	> 8m2 per 2 person	Yes	Yes
78	Seronegative	Male	10-14	Single	Completed primary education	Student	Low income	Son/Daughter	>=2 years	Good	> 8m2 per 2 person	Yes	Yes
53	Seronegative	Female	10-14	Single	Completed primary education	Student	Low income	Son/Daughter	>=2 years	Good	> 8m2 per 2 person	Yes	Yes
94	Seronegative	Female	10-14	Single	Completed primary education	Student	Low income	Son/Daughter	>=2 years	Good	> 8m2 per 2 person	Yes	Yes
99	Seronegative	Female	15-24	Single	Completed primary education	Student	Low income	Son/Daughter	>=2 years	Good	> 8m2 per 2 person	Yes	Yes
80	Seropositive	Male	10-14	Single	Completed junior high school	Student	Low income	Son/Daughter	>=2 years	Good	> 8m2 per 2 person	Yes	Yes
79	Seronegative	Male	10-14	Single	Completed junior high school	Student	Low income	Son/Daughter	>=2 years	Good	> 8m2 per 2 person	Yes	Yes
100	Seronegative	Male	10-14	Single	Completed junior high school	Student	Low income	Son/Daughter	>=2 years	Good	> 8m2 per 2 person	Yes	Yes
83	Seropositive	Male	15-24	Single	Completed junior high school	Student	Low income	Son/Daughter	>=2 years	Good	> 8m2 per 2 person	Yes	Yes
101	Seronegative	Male	15-24	Single	Completed junior high school	Student	Low income	Son/Daughter	>=2 years	Good	> 8m2 per 2 person	Yes	Yes
149	Seronegative	Male	15-24	Single	Completed junior high school	Student	Low income	Son/Daughter	>=2 years	Good	> 8m2 per 2 person	Yes	Yes
150	Seronegative	Male	15-24	Single	Completed junior high school	Student	Low income	Son/Daughter	>=2 years	Good	> 8m2 per 2 person	Yes	Yes
102	Seronegative	Male	15-24	Single	Completed senior high school	Student	Low income	Son/Daughter	>=2 years	Good	> 8m2 per 2 person	Yes	Yes
95	Seronegative	Female	15-24	Single	Completed senior high school	Student	Low income	Son/Daughter	>=2 years	Good	> 8m2 per 2 person	Yes	Yes
96	Seronegative	Female	15-24	Single	Completed senior high school	Student	Low income	Son/Daughter	>=2 years	Good	> 8m2 per 2 person	Yes	Yes
103	Seropositive	Male	25-34	Single	Completed senior high school	Student	Low income	Son/Daughter	>=2 years	Good	> 8m2 per 2 person	Yes	Yes
104	Seronegative	Male	25-34	Single	Completed senior high school	Student	Low income	Son/Daughter	>=2 years	Good	> 8m2 per 2 person	Yes	Yes
74	Seropositive	Female	15-24	Single	Completed senior high school	Private sector employee	Low income	Son/Daughter	>=2 years	Good	> 8m2 per 2 person	Yes	Yes
105	Seropositive	Female	15-24	Single	Completed senior high school	Private sector employee	Low income	Son/Daughter	>=2 years	Good	> 8m2 per 2 person	Yes	Yes
106	Seropositive	Female	15-24	Single	Completed senior high school	Private sector employee	Low income	Son/Daughter	>=2 years	Good	> 8m2 per 2 person	Yes	Yes
107	Seropositive	Male	25-34	Single	Completed senior high school	Private sector employee	Low income	Son/Daughter	>=2 years	Good	> 8m2 per 2 person	Yes	Yes
81	Seronegative	Male	35-44	Single	Completed senior high school	Self employee	Low income	Son/Daughter	>=2 years	Good	> 8m2 per 2 person	Yes	Yes
82	Seropositive	Female	25-34	Married	Completed senior high school	Self employee	Low income	Son/Daughter	>=2 years	Good	> 8m2 per 2 person	Yes	Yes
108	Seronegative	Female	35-44	Married	Completed primary education	Labor	Low income	Son/Daughter	>=2 years	Good	> 8m2 per 2 person	Yes	Yes
109	Seronegative	Male	15-24	Single	Completed senior high school	Labor	Low income	Son/Daughter	>=2 years	Good	> 8m2 per 2 person	Yes	Yes
110	Seronegative	Male	25-34	Married	Completed senior high school	Labor	Low income	Son/Daughter	>=2 years	Good	> 8m2 per 2 person	Yes	Yes
148	Seronegative	Female	25-34	Divorced	Completed senior high school	Labor	Low income	Son/Daughter	>=2 years	Good	> 8m2 per 2 person	Yes	Yes
111	Seropositive	Male	5-9	Single	Not completed primary education	Student	High income	Grandchild	>=2 years	Good	> 8m2 per 2 person	Yes	Yes
115	Seropositive	Male	5-9	Single	Not completed primary education	Student	High income	Grandchild	>=2 years	Good	> 8m2 per 2 person	Yes	Yes
116	Seronegative	Female	5-9	Single	Not completed primary education	Student	High income	Grandchild	>=2 years	Good	> 8m2 per 2 person	Yes	Yes
112	Seronegative	Male	10-14	Single	Not completed primary education	Student	High income	Grandchild	>=2 years	Good	> 8m2 per 2 person	Yes	Yes
113	Seropositive	Female	10-14	Single	Completed primary education	Student	High income	Grandchild	>=2 years	Good	> 8m2 per 2 person	Yes	Yes
117	Seropositive	Female	10-14	Single	Completed primary education	Student	High income	Grandchild	>=2 years	Good	> 8m2 per 2 person	Yes	Yes
114	Seronegative	Female	10-14	Single	Completed primary education	Student	High income	Grandchild	>=2 years	Good	> 8m2 per 2 person	Yes	Yes
124	Seropositive	Female	5-9	Single	Without education	Not working	Low income	Grandchild	>=2 years	Good	> 8m2 per 2 person	Yes	Yes
118	Seronegative	Female	5-9	Single	Without education	Not working	Low income	Grandchild	>=2 years	Good	> 8m2 per 2 person	Yes	Yes
123	Seronegative	Female	5-9	Single	Without education	Not working	Low income	Grandchild	>=2 years	Good	> 8m2 per 2 person	Yes	Yes
120	Seronegative	Male	15-24	Single	Completed senior high school	Not working	Low income	Grandchild	>=2 years	Good	> 8m2 per 2 person	Yes	Yes
125	Seropositive	Female	1-4	Single	Without education	Student	Low income	Grandchild	>=2 years	Good	> 8m2 per 2 person	Yes	Yes
121	Seronegative	Female	5-9	Single	Without education	Student	Low income	Grandchild	>=2 years	Good	> 8m2 per 2 person	Yes	Yes
126	Seropositive	Female	5-9	Single	Not completed primary education	Student	Low income	Grandchild	>=2 years	Good	> 8m2 per 2 person	Yes	Yes
128	Seronegative	Female	5-9	Single	Not completed primary education	Student	Low income	Grandchild	>=2 years	Good	> 8m2 per 2 person	Yes	Yes
127	Seronegative	Female	10-14	Single	Not completed primary education	Student	Low income	Grandchild	>=2 years	Good	> 8m2 per 2 person	Yes	Yes
129	Seronegative	Male	15-24	Single	Completed junior high school	Student	Low income	Grandchild	>=2 years	Good	> 8m2 per 2 person	Yes	Yes
119	Seronegative	Male	15-24	Single	Completed senior high school	Student	Low income	Grandchild	>=2 years	Good	> 8m2 per 2 person	Yes	Yes
122	Seronegative	Female	15-24	Widowed	Completed senior high school	Self employee	Low income	Grandchild	>=2 years	Good	> 8m2 per 2 person	Yes	Yes
130	Seronegative	Male	25-34	Single	Completed senior high school	Labor	Low income	Grandchild	>=2 years	Good	> 8m2 per 2 person	Yes	Yes
135	Seropositive	Female	15-24	Married	Completed primary education	Not working	High income	Son/Daughter in Law	>=2 years	Good	> 8m2 per 2 person	Yes	Yes
133	Seropositive	Female	35-44	Married	Completed junior high school	Not working	High income	Son/Daughter in Law	>=2 years	Good	> 8m2 per 2 person	Yes	Yes
136	Seronegative	Female	25-34	Married	Completed senior high school	Not working	High income	Son/Daughter in Law	>=2 years	Good	> 8m2 per 2 person	Yes	Yes
132	Seropositive	Male	35-44	Single	Completed senior high school	Government employee	High income	Son/Daughter in Law	>=2 years	Good	> 8m2 per 2 person	Yes	Yes
134	Seropositive	Male	25-34	Married	Completed senior high school	Private sector employee	High income	Son/Daughter in Law	>=2 years	Good	> 8m2 per 2 person	Yes	Yes
131	Seropositive	Male	35-44	Married	Completed senior high school	Private sector employee	High income	Son/Daughter in Law	>=2 years	Good	> 8m2 per 2 person	Yes	Yes
137	Seropositive	Male	35-44	Married	Completed primary education	Labor	High income	Son/Daughter in Law	>=2 years	Good	> 8m2 per 2 person	Yes	Yes
138	Seropositive	Female	15-24	Married	Completed junior high school	Not working	Low income	Son/Daughter in Law	>=2 years	Good	> 8m2 per 2 person	Yes	Yes
151	Seropositive	Female	45-54	Married	Completed junior high school	Labor	Low income	Son/Daughter in Law	>=2 years	Good	> 8m2 per 2 person	Yes	Yes
139	Seronegative	Female	10-14	Single	Completed primary education	Student	Low income	Parents/Parents in Law	>=2 years	Good	> 8m2 per 2 person	Yes	Yes
140	Seropositive	Female	15-24	Single	Completed senior high school	Student	Low income	Parents/Parents in Law	>=2 years	Good	> 8m2 per 2 person	Yes	Yes
142	Seronegative	Male	15-24	Single	Completed senior high school	Not working	Low income	Other families	>=2 years	Good	> 8m2 per 2 person	Yes	Yes
141	Seronegative	Female	5-9	Single	Not completed primary education	Student	Low income	Other families	>=2 years	Good	> 8m2 per 2 person	Yes	Yes
144	Seronegative	Female	5-9	Single	Not completed primary education	Student	Low income	Other families	>=2 years	Good	> 8m2 per 2 person	Yes	Yes
145	Seronegative	Female	10-14	Single	Not completed primary education	Student	Low income	Other families	>=2 years	Good	> 8m2 per 2 person	Yes	Yes
143	Seronegative	Female	10-14	Single	Completed primary education	Student	Low income	Other families	>=2 years	Good	> 8m2 per 2 person	Yes	Yes
146	Seropositive	Male	55-64	Single	Completed primary education	Labor	Low income	Other families	>=2 years	Good	> 8m2 per 2 person	Yes	Yes
152	Seropositive	Male	1-4	Divorced	Completed senior high school	Not working	Low income	Husbnad/Wife	>=2 years	Poor	> 8m2 per 2 person	Yes	Yes
154	Seropositive	Male	10-14	Single	Completed primary education	Student	Low income	Son/Daughter	>=2 years	Poor	> 8m2 per 2 person	Yes	Yes
155	Seronegative	Male	10-14	Single	Completed primary education	Student	Low income	Son/Daughter	>=2 years	Poor	> 8m2 per 2 person	Yes	Yes
158	Seropositive	Male	15-24	Single	Completed junior high school	Student	Low income	Son/Daughter	>=2 years	Poor	> 8m2 per 2 person	Yes	Yes
153	Seropositive	Female	15-24	Single	Completed junior high school	Student	Low income	Son/Daughter	>=2 years	Poor	> 8m2 per 2 person	Yes	Yes
156	Seropositive	Female	10-14	Single	Completed primary education	Student	Low income	Grandchild	>=2 years	Poor	> 8m2 per 2 person	Yes	Yes
157	Seronegative	Female	10-14	Single	Completed primary education	Student	Low income	Other families	>=2 years	Poor	> 8m2 per 2 person	Yes	Yes
159	Seronegative	Male	35-44	Married	Completed junior high school	Labor	Low income	Husbnad/Wife	>=2 years	Good	< 8m2 per 2 person	No	Yes
160	Seropositive	Male	15-24	Single	Completed senior high school	Not working	High income	Son/Daughter	>=2 years	Good	< 8m2 per 2 person	No	Yes
161	Seronegative	Female	25-34	Married	Completed senior high school	Not working	Low income	Son/Daughter	>=2 years	Good	< 8m2 per 2 person	No	Yes
162	Seronegative	Female	10-14	Single	Completed primary education	Student	Low income	Son/Daughter	>=2 years	Poor	< 8m2 per 2 person	No	Yes
163	Seronegative	Female	65-74	Widowed	Without education	Not working	High income	Husbnad/Wife	>=2 years	Good	> 8m2 per 2 person	No	Yes
165	Seronegative	Female	35-44	Married	Completed primary education	Not working	Low income	Husbnad/Wife	>=2 years	Good	> 8m2 per 2 person	No	Yes
164	Seronegative	Female	55-64	Married	Completed primary education	Not working	Low income	Husbnad/Wife	>=2 years	Good	> 8m2 per 2 person	No	Yes
166	Seropositive	Female	35-44	Married	Completed junior high school	Not working	Low income	Husbnad/Wife	>=2 years	Good	> 8m2 per 2 person	No	Yes
167	Seronegative	Female	15-24	Married	Completed junior high school	Not working	High income	Son/Daughter	>=2 years	Good	> 8m2 per 2 person	No	Yes
168	Seronegative	Female	15-24	Single	Completed senior high school	Not working	High income	Son/Daughter	>=2 years	Good	> 8m2 per 2 person	No	Yes
169	Seropositive	Female	25-34	Married	Completed senior high school	Not working	High income	Son/Daughter	>=2 years	Good	> 8m2 per 2 person	No	Yes
170	Seronegative	Female	5-9	Single	Not completed primary education	Student	High income	Son/Daughter	>=2 years	Good	> 8m2 per 2 person	No	Yes
171	Seronegative	Male	25-34	Married	Completed senior high school	Labor	High income	Son/Daughter	>=2 years	Good	> 8m2 per 2 person	No	Yes
172	Seronegative	Female	1-4	Single	Without education	Not working	Low income	Son/Daughter	>=2 years	Good	> 8m2 per 2 person	No	Yes
173	Seronegative	Male	5-9	Single	Without education	Not working	Low income	Son/Daughter	>=2 years	Good	> 8m2 per 2 person	No	Yes
175	Seropositive	Female	35-44	Married	Completed junior high school	Not working	Low income	Son/Daughter	>=2 years	Good	> 8m2 per 2 person	No	Yes
174	Seronegative	Female	15-24	Married	Completed senior high school	Not working	Low income	Son/Daughter	>=2 years	Good	> 8m2 per 2 person	No	Yes
176	Seropositive	Male	5-9	Single	Not completed primary education	Student	Low income	Son/Daughter	>=2 years	Good	> 8m2 per 2 person	No	Yes
177	Seronegative	Female	25-34	Divorced	Completed senior high school	Private sector employee	Low income	Son/Daughter	>=2 years	Good	> 8m2 per 2 person	No	Yes
178	Seronegative	Male	25-34	Single	Completed senior high school	Self employee	Low income	Son/Daughter	>=2 years	Good	> 8m2 per 2 person	No	Yes
179	Seronegative	Male	10-14	Single	Without education	Labor	Low income	Son/Daughter	>=2 years	Good	> 8m2 per 2 person	No	Yes
182	Seropositive	Female	15-24	Married	Completed senior high school	Not working	Low income	Grandchild	>=2 years	Good	> 8m2 per 2 person	No	Yes
183	Seropositive	Male	10-14	Single	Not completed primary education	Student	Low income	Grandchild	>=2 years	Good	> 8m2 per 2 person	No	Yes
180	Seronegative	Female	10-14	Single	Not completed primary education	Student	Low income	Grandchild	>=2 years	Good	> 8m2 per 2 person	No	Yes
181	Seronegative	Male	10-14	Single	Completed primary education	Student	Low income	Grandchild	>=2 years	Good	> 8m2 per 2 person	No	Yes
184	Seronegative	Female	15-24	Single	Completed senior high school	Private sector employee	Low income	Grandchild	>=2 years	Good	> 8m2 per 2 person	No	Yes
185	Seronegative	Male	35-44	Married	Completed senior high school	Private sector employee	High income	Son/Daughter in Law	>=2 years	Good	> 8m2 per 2 person	No	Yes
186	Seropositive	Female	25-34	Married	Completed senior high school	Not working	High income	Parents/Parents in Law	>=2 years	Good	> 8m2 per 2 person	No	Yes
187	Seronegative	Female	35-44	Married	Completed junior high school	Self employee	Low income	Parents/Parents in Law	>=2 years	Good	> 8m2 per 2 person	No	Yes
188	Seropositive	Female	10-14	Single	Completed junior high school	Student	Low income	Other families	>=2 years	Good	> 8m2 per 2 person	No	Yes
189	Seronegative	Male	1-4	Single	Completed junior high school	Not working	High income	Parents/Parents in Law	>=2 years	Poor	> 8m2 per 2 person	No	Yes
190	Seronegative	Male	5-9	Single	Without education	Not working	High income	Son/Daughter	>=2 years	Good	< 8m2 per 2 person	Yes	No
192	Seropositive	Male	10-14	Single	Completed primary education	Student	Low income	Son/Daughter	>=2 years	Good	< 8m2 per 2 person	Yes	No
195	Seropositive	Male	10-14	Single	Completed primary education	Student	Low income	Son/Daughter	>=2 years	Good	< 8m2 per 2 person	Yes	No
191	Seropositive	Female	10-14	Single	Completed primary education	Student	Low income	Son/Daughter	>=2 years	Good	< 8m2 per 2 person	Yes	No
193	Seropositive	Male	15-24	Married	Completed senior high school	Self employee	Low income	Son/Daughter	>=2 years	Good	< 8m2 per 2 person	Yes	No
194	Seronegative	Male	25-34	Married	Completed senior high school	Self employee	Low income	Son/Daughter	>=2 years	Good	< 8m2 per 2 person	Yes	No
196	Seronegative	Male	15-24	Single	Completed senior high school	Student	Low income	Grandchild	>=2 years	Good	< 8m2 per 2 person	Yes	No
197	Seronegative	Female	15-24	Single	Completed junior high school	Student	Low income	Parents/Parents in Law	>=2 years	Good	< 8m2 per 2 person	Yes	No
198	Seropositive	Female	5-9	Single	Not completed primary education	Student	Low income	Other families	>=2 years	Good	< 8m2 per 2 person	Yes	No
199	Seropositive	Female	15-24	Single	Not completed primary education	Student	Low income	Other families	>=2 years	Good	< 8m2 per 2 person	Yes	No
200	Seropositive	Female	10-14	Single	Completed primary education	Student	Low income	Other families	>=2 years	Good	< 8m2 per 2 person	Yes	No
201	Seronegative	Female	10-14	Single	Completed primary education	Student	Low income	Other families	>=2 years	Good	< 8m2 per 2 person	Yes	No
202	Seropositive	Female	45-54	Married	Completed junior high school	Not working	Low income	Husbnad/Wife	>=2 years	Good	> 8m2 per 2 person	Yes	No
203	Seronegative	Female	45-54	Married	Completed junior high school	Not working	Low income	Husbnad/Wife	>=2 years	Good	> 8m2 per 2 person	Yes	No
204	Seronegative	Female	35-44	Married	Without education	Labor	Low income	Husbnad/Wife	>=2 years	Good	> 8m2 per 2 person	Yes	No
205	Seronegative	Female	45-54	Married	Without education	Labor	Low income	Husbnad/Wife	>=2 years	Good	> 8m2 per 2 person	Yes	No
206	Seronegative	Female	15-24	Married	Completed senior high school	Self employee	High income	Son/Daughter	>=2 years	Good	> 8m2 per 2 person	Yes	No
207	Seropositive	Male	15-24	Single	Completed primary education	Not working	Low income	Son/Daughter	>=2 years	Good	> 8m2 per 2 person	Yes	No
210	Seronegative	Female	35-44	Married	Completed junior high school	Not working	Low income	Son/Daughter	>=2 years	Good	> 8m2 per 2 person	Yes	No
211	Seropositive	Female	15-24	Married	Completed senior high school	Not working	Low income	Son/Daughter	>=2 years	Good	> 8m2 per 2 person	Yes	No
208	Seropositive	Female	25-34	Married	Completed senior high school	Not working	Low income	Son/Daughter	>=2 years	Good	> 8m2 per 2 person	Yes	No
212	Seropositive	Female	15-24	Single	Completed junior high school	Student	Low income	Son/Daughter	>=2 years	Good	> 8m2 per 2 person	Yes	No
214	Seronegative	Female	15-24	Married	Completed junior high school	Student	Low income	Son/Daughter	>=2 years	Good	> 8m2 per 2 person	Yes	No
209	Seropositive	Female	15-24	Single	Completed senior high school	Student	Low income	Son/Daughter	>=2 years	Good	> 8m2 per 2 person	Yes	No
213	Seropositive	Female	15-24	Single	Completed senior high school	Student	Low income	Son/Daughter	>=2 years	Good	> 8m2 per 2 person	Yes	No
215	Seropositive	Female	15-24	Single	Completed senior high school	Self employee	Low income	Son/Daughter	>=2 years	Good	> 8m2 per 2 person	Yes	No
216	Seropositive	Female	5-9	Single	Without education	Not working	High income	Grandchild	>=2 years	Good	> 8m2 per 2 person	Yes	No
223	Seropositive	Male	5-9	Single	Not completed primary education	Student	Low income	Grandchild	>=2 years	Good	> 8m2 per 2 person	Yes	No
224	Seronegative	Male	10-14	Single	Not completed primary education	Student	Low income	Grandchild	>=2 years	Good	> 8m2 per 2 person	Yes	No
217	Seropositive	Male	10-14	Single	Completed primary education	Student	Low income	Grandchild	>=2 years	Good	> 8m2 per 2 person	Yes	No
218	Seropositive	Female	10-14	Single	Completed junior high school	Student	Low income	Grandchild	>=2 years	Good	> 8m2 per 2 person	Yes	No
219	Seronegative	Male	15-24	Single	Completed junior high school	Student	Low income	Grandchild	>=2 years	Good	> 8m2 per 2 person	Yes	No
225	Seropositive	Female	15-24	Single	Completed primary education	Not working	Low income	Son/Daughter in Law	>=2 years	Good	> 8m2 per 2 person	Yes	No
221	Seronegative	Female	35-44	Married	Completed senior high school	Not working	Low income	Parents/Parents in Law	>=2 years	Good	> 8m2 per 2 person	Yes	No
220	Seropositive	Male	10-14	Single	Completed junior high school	Student	Low income	Parents/Parents in Law	>=2 years	Good	> 8m2 per 2 person	Yes	No
222	Seropositive	Female	15-24	Single	Completed junior high school	Not working	Low income	Other families	>=2 years	Good	> 8m2 per 2 person	Yes	No
226	Seropositive	Male	35-44	Single	Completed junior high school	Not working	High income	Son/Daughter	>=2 years	Poor	> 8m2 per 2 person	Yes	No
227	Seronegative	Female	35-44	Married	Completed junior high school	Not working	High income	Grandchild	>=2 years	Poor	> 8m2 per 2 person	Yes	No
228	Seropositive	Male	35-44	Married	Completed primary education	Labor	High income	Husbnad/Wife	>=2 years	Good	< 8m2 per 2 person	No	No
229	Seronegative	Male	35-44	Married	Completed primary education	Labor	High income	Husbnad/Wife	>=2 years	Good	< 8m2 per 2 person	No	No
230	Seronegative	Female	45-54	Married	Not completed primary education	Not working	Low income	Husbnad/Wife	>=2 years	Good	< 8m2 per 2 person	No	No
231	Seronegative	Female	55-64	Married	Not completed primary education	Not working	Low income	Husbnad/Wife	>=2 years	Good	< 8m2 per 2 person	No	No
232	Seronegative	Female	35-44	Married	Completed primary education	Not working	Low income	Husbnad/Wife	>=2 years	Good	< 8m2 per 2 person	No	No
233	Seronegative	Female	45-54	Married	Completed primary education	Not working	Low income	Husbnad/Wife	>=2 years	Good	< 8m2 per 2 person	No	No
234	Seronegative	Male	55-64	Married	Not completed primary education	Labor	Low income	Husbnad/Wife	>=2 years	Good	< 8m2 per 2 person	No	No
237	Seropositive	Female	25-34	Married	Completed primary education	Not working	Low income	Son/Daughter	>=2 years	Good	< 8m2 per 2 person	No	No
239	Seronegative	Female	15-24	Single	Completed junior high school	Student	Low income	Son/Daughter	>=2 years	Good	< 8m2 per 2 person	No	No
238	Seropositive	Female	15-24	Single	Completed senior high school	Student	Low income	Son/Daughter	>=2 years	Good	< 8m2 per 2 person	No	No
235	Seropositive	Male	15-24	Single	Completed senior high school	Private sector employee	Low income	Son/Daughter	>=2 years	Good	< 8m2 per 2 person	No	No
236	Seronegative	Male	15-24	Single	Completed senior high school	Private sector employee	Low income	Son/Daughter	>=2 years	Good	< 8m2 per 2 person	No	No
240	Seronegative	Male	15-24	Single	Completed primary education	Labor	Low income	Son/Daughter	>=2 years	Good	< 8m2 per 2 person	No	No
242	Seronegative	Female	5-9	Single	Not completed primary education	Student	Low income	Grandchild	>=2 years	Good	< 8m2 per 2 person	No	No
241	Seronegative	Male	10-14	Single	Completed primary education	Student	Low income	Grandchild	>=2 years	Good	< 8m2 per 2 person	No	No
243	Seronegative	Female	35-44	Married	Completed senior high school	Not working	Low income	Son/Daughter in Law	>=2 years	Good	< 8m2 per 2 person	No	No
244	Seronegative	Female	25-34	Married	Completed senior high school	Labor	Low income	Husbnad/Wife	>=2 years	Poor	< 8m2 per 2 person	No	No
245	Seronegative	Male	15-24	Single	Completed primary education	Student	Low income	Son/Daughter	>=2 years	Poor	< 8m2 per 2 person	No	No
247	Seropositive	Female	55-64	Married	Without education	Not working	High income	Husbnad/Wife	>=2 years	Good	> 8m2 per 2 person	No	No
248	Seropositive	Female	35-44	Married	Not completed primary education	Not working	High income	Husbnad/Wife	>=2 years	Good	> 8m2 per 2 person	No	No
249	Seropositive	Female	35-44	Married	Completed junior high school	Not working	High income	Husbnad/Wife	>=2 years	Good	> 8m2 per 2 person	No	No
246	Seronegative	Female	45-54	Married	Completed senior high school	Not working	High income	Husbnad/Wife	>=2 years	Good	> 8m2 per 2 person	No	No
250	Seronegative	Female	45-54	Married	Not completed primary education	Labor	High income	Husbnad/Wife	>=2 years	Good	> 8m2 per 2 person	No	No
258	Seronegative	Female	55-64	Single	Without education	Not working	Low income	Husbnad/Wife	>=2 years	Good	> 8m2 per 2 person	No	No
251	Seropositive	Female	45-54	Married	Without education	Not working	Low income	Husbnad/Wife	>=2 years	Good	> 8m2 per 2 person	No	No
256	Seropositive	Female	55-64	Married	Without education	Not working	Low income	Husbnad/Wife	>=2 years	Good	> 8m2 per 2 person	No	No
257	Seropositive	Female	55-64	Married	Without education	Not working	Low income	Husbnad/Wife	>=2 years	Good	> 8m2 per 2 person	No	No
259	Seronegative	Female	55-64	Married	Without education	Not working	Low income	Husbnad/Wife	>=2 years	Good	> 8m2 per 2 person	No	No
260	Seronegative	Female	35-44	Married	Not completed primary education	Not working	Low income	Husbnad/Wife	>=2 years	Good	> 8m2 per 2 person	No	No
252	Seronegative	Female	35-44	Married	Completed primary education	Not working	Low income	Husbnad/Wife	>=2 years	Good	> 8m2 per 2 person	No	No
254	Seropositive	Female	55-64	Married	Completed primary education	Not working	Low income	Husbnad/Wife	>=2 years	Good	> 8m2 per 2 person	No	No
253	Seronegative	Female	65-74	Married	Without education	Self employee	Low income	Husbnad/Wife	>=2 years	Good	> 8m2 per 2 person	No	No
261	Seropositive	Female	35-44	Married	Not completed primary education	Self employee	Low income	Husbnad/Wife	>=2 years	Good	> 8m2 per 2 person	No	No
255	Seronegative	Female	45-54	Married	Completed primary education	Farmer	Low income	Husbnad/Wife	>=2 years	Good	> 8m2 per 2 person	No	No
263	Seropositive	Female	25-34	Married	Without education	Labor	Low income	Husbnad/Wife	>=2 years	Good	> 8m2 per 2 person	No	No
262	Seropositive	Female	35-44	Married	Completed primary education	Labor	Low income	Husbnad/Wife	>=2 years	Good	> 8m2 per 2 person	No	No
264	Seropositive	Female	55-64	Married	Completed junior high school	Not working	High income	Son/Daughter	>=2 years	Good	> 8m2 per 2 person	No	No
265	Seronegative	Male	45-54	Married	Completed primary education	Self employee	High income	Son/Daughter	>=2 years	Good	> 8m2 per 2 person	No	No
279	Seronegative	Female	1-4	Single	Without education	Not working	Low income	Son/Daughter	>=2 years	Good	> 8m2 per 2 person	No	No
266	Seronegative	Female	45-54	Widowed	Without education	Not working	Low income	Son/Daughter	>=2 years	Good	> 8m2 per 2 person	No	No
280	Seronegative	Female	45-54	Married	Not completed primary education	Not working	Low income	Son/Daughter	>=2 years	Good	> 8m2 per 2 person	No	No
273	Seropositive	Female	25-34	Married	Completed primary education	Not working	Low income	Son/Daughter	>=2 years	Good	> 8m2 per 2 person	No	No
268	Seronegative	Male	15-24	Single	Completed junior high school	Not working	Low income	Son/Daughter	>=2 years	Good	> 8m2 per 2 person	No	No
267	Seropositive	Female	35-44	Married	Completed junior high school	Not working	Low income	Son/Daughter	>=2 years	Good	> 8m2 per 2 person	No	No
281	Seropositive	Male	15-24	Single	Completed senior high school	Not working	Low income	Son/Daughter	>=2 years	Good	> 8m2 per 2 person	No	No
282	Seropositive	Male	15-24	Single	Completed senior high school	Not working	Low income	Son/Daughter	>=2 years	Good	> 8m2 per 2 person	No	No
269	Seronegative	Male	15-24	Single	Completed senior high school	Not working	Low income	Son/Daughter	>=2 years	Good	> 8m2 per 2 person	No	No
274	Seronegative	Female	35-44	Married	Completed senior high school	Not working	Low income	Son/Daughter	>=2 years	Good	> 8m2 per 2 person	No	No
270	Seropositive	Female	5-9	Single	Not completed primary education	Student	Low income	Son/Daughter	>=2 years	Good	> 8m2 per 2 person	No	No
285	Seropositive	Female	5-9	Single	Not completed primary education	Student	Low income	Son/Daughter	>=2 years	Good	> 8m2 per 2 person	No	No
277	Seronegative	Female	5-9	Single	Not completed primary education	Student	Low income	Son/Daughter	>=2 years	Good	> 8m2 per 2 person	No	No
283	Seronegative	Female	10-14	Single	Not completed primary education	Student	Low income	Son/Daughter	>=2 years	Good	> 8m2 per 2 person	No	No
271	Seronegative	Male	10-14	Single	Completed primary education	Student	Low income	Son/Daughter	>=2 years	Good	> 8m2 per 2 person	No	No
276	Seropositive	Female	10-14	Single	Completed primary education	Student	Low income	Son/Daughter	>=2 years	Good	> 8m2 per 2 person	No	No
284	Seronegative	Male	15-24	Single	Completed junior high school	Student	Low income	Son/Daughter	>=2 years	Good	> 8m2 per 2 person	No	No
278	Seronegative	Female	15-24	Single	Completed junior high school	Student	Low income	Son/Daughter	>=2 years	Good	> 8m2 per 2 person	No	No
286	Seropositive	Female	15-24	Married	Completed junior high school	Student	Low income	Son/Daughter	>=2 years	Good	> 8m2 per 2 person	No	No
312	Seronegative	Male	15-24	Single	Completed senior high school	Student	Low income	Son/Daughter	>=2 years	Good	> 8m2 per 2 person	No	No
313	Seronegative	Male	15-24	Single	Completed senior high school	Student	Low income	Son/Daughter	>=2 years	Good	> 8m2 per 2 person	No	No
275	Seropositive	Male	25-34	Single	Completed senior high school	Private sector employee	Low income	Son/Daughter	>=2 years	Good	> 8m2 per 2 person	No	No
287	Seronegative	Male	25-34	Single	Completed senior high school	Private sector employee	Low income	Son/Daughter	>=2 years	Good	> 8m2 per 2 person	No	No
288	Seropositive	Female	25-34	Married	Completed senior high school	Private sector employee	Low income	Son/Daughter	>=2 years	Good	> 8m2 per 2 person	No	No
290	Seronegative	Female	35-44	Married	Completed primary education	Labor	Low income	Son/Daughter	>=2 years	Good	> 8m2 per 2 person	No	No
291	Seropositive	Male	15-24	Single	Completed junior high school	Labor	Low income	Son/Daughter	>=2 years	Good	> 8m2 per 2 person	No	No
289	Seropositive	Male	15-24	Single	Completed senior high school	Labor	Low income	Son/Daughter	>=2 years	Good	> 8m2 per 2 person	No	No
272	Seronegative	Male	15-24	Single	Completed senior high school	Labor	Low income	Son/Daughter	>=2 years	Good	> 8m2 per 2 person	No	No
292	Seronegative	Male	25-34	Single	Completed senior high school	Labor	Low income	Son/Daughter	>=2 years	Good	> 8m2 per 2 person	No	No
293	Seropositive	Male	1-4	Widowed	Completed senior high school	Labor	Low income	Son/Daughter	>=2 years	Good	> 8m2 per 2 person	No	No
294	Seronegative	Female	5-9	Single	Without education	Not working	High income	Grandchild	>=2 years	Good	> 8m2 per 2 person	No	No
299	Seronegative	Male	5-9	Single	Without education	Not working	Low income	Grandchild	>=2 years	Good	> 8m2 per 2 person	No	No
314	Seronegative	Female	1-4	Single	Completed junior high school	Not working	Low income	Grandchild	>=2 years	Good	> 8m2 per 2 person	No	No
297	Seropositive	Female	15-24	Single	Completed senior high school	Not working	Low income	Grandchild	>=2 years	Good	> 8m2 per 2 person	No	No
295	Seropositive	Male	5-9	Single	Not completed primary education	Student	Low income	Grandchild	>=2 years	Good	> 8m2 per 2 person	No	No
300	Seronegative	Male	5-9	Single	Not completed primary education	Student	Low income	Grandchild	>=2 years	Good	> 8m2 per 2 person	No	No
296	Seronegative	Female	5-9	Single	Not completed primary education	Student	Low income	Grandchild	>=2 years	Good	> 8m2 per 2 person	No	No
298	Seropositive	Female	10-14	Single	Completed primary education	Student	Low income	Grandchild	>=2 years	Good	> 8m2 per 2 person	No	No
301	Seronegative	Male	15-24	Single	Completed junior high school	Student	Low income	Grandchild	>=2 years	Good	> 8m2 per 2 person	No	No
302	Seropositive	Female	15-24	Single	Completed junior high school	Student	Low income	Grandchild	>=2 years	Good	> 8m2 per 2 person	No	No
303	Seronegative	Male	15-24	Single	Completed senior high school	Student	Low income	Grandchild	>=2 years	Good	> 8m2 per 2 person	No	No
304	Seronegative	Male	15-24	Single	Completed junior high school	Self employee	Low income	Grandchild	>=2 years	Good	> 8m2 per 2 person	No	No
306	Seropositive	Female	35-44	Married	Completed junior high school	Not working	Low income	Son/Daughter in Law	>=2 years	Good	> 8m2 per 2 person	No	No
305	Seronegative	Male	25-34	Married	Completed senior high school	Private sector employee	Low income	Son/Daughter in Law	>=2 years	Good	> 8m2 per 2 person	No	No
307	Seronegative	Female	65-74	Widowed	Without education	Not working	Low income	Parents/Parents in Law	>=2 years	Good	> 8m2 per 2 person	No	No
308	Seropositive	Female	25-34	Married	Completed primary education	Self employee	Low income	Parents/Parents in Law	>=2 years	Good	> 8m2 per 2 person	No	No
309	Seropositive	Female	35-44	Married	Completed junior high school	Not working	Low income	Other families	>=2 years	Good	> 8m2 per 2 person	No	No
310	Seropositive	Male	5-9	Single	Not completed primary education	Student	Low income	Other families	>=2 years	Good	> 8m2 per 2 person	No	No
311	Seronegative	Male	25-34	Married	Not completed primary education	Student	Low income	Other families	>=2 years	Good	> 8m2 per 2 person	No	No
315	Seropositive	Female	55-64	Married	Not completed primary education	Farmer	Low income	Husbnad/Wife	>=2 years	Poor	> 8m2 per 2 person	No	No
316	Seropositive	Female	25-34	Single	Without education	Not working	Low income	Son/Daughter	>=2 years	Poor	> 8m2 per 2 person	No	No
318	Seronegative	Female	35-44	Single	Not completed primary education	Not working	Low income	Son/Daughter	>=2 years	Poor	> 8m2 per 2 person	No	No
319	Seropositive	Male	10-14	Single	Not completed primary education	Student	Low income	Son/Daughter	>=2 years	Poor	> 8m2 per 2 person	No	No
317	Seropositive	Male	15-24	Single	Completed junior high school	Student	Low income	Son/Daughter	>=2 years	Poor	> 8m2 per 2 person	No	No
320	Seronegative	Female	15-24	Single	Completed senior high school	Not working	Low income	Other families	>=2 years	Poor	> 8m2 per 2 person	No	No
